# Supplementary material for: The accuracy challenge of the DFT-based molecular assignment of13C MAS NMR characterization of surface intermediates in zeolite catalysis
Source: Royal Society of Chemistry journal article supplement (doi:10.1039/d0cp04439c), 2020-01-01
Supplement: d0cp04439c1.pdf [file d0cp04439c1.pdf]

## Supporting Information

# The accuracy challenge of DFT-based molecular assignment of $^{13}\text{C}$ MAS NMR characterization of surface intermediates in zeolite catalysis.

Alexander A. Kolganov<sup>1</sup>, Anton A. Gabrienko<sup>1,2</sup>, Ivan Yu. Chernyshov<sup>3</sup>, Alexander G. Stepanov<sup>1,2</sup>, Evgeny A. Pidko<sup>\*3,4</sup>

<sup>1</sup>Boreskov Institute of Catalysis, Siberian Branch of the Russian Academy of Sciences, Prospekt Akademika Lavrentieva 5, Novosibirsk 630090, Russia

<sup>2</sup>Faculty of Natural Sciences, Department of Physical Chemistry, Novosibirsk State University, Pirogova Str. 2, Novosibirsk 630090, Russia

<sup>3</sup>TheoMAT Group, ChemBio Cluster, ITMO University, Lomonosova Street 9, Saint Petersburg, 191002, Russia

<sup>4</sup>Inorganic Systems Engineering group, Department of Chemical Engineering, Faculty of Applied Sciences, Delft University of Technology, Van der Maasweg 9, Delft 2629 HZ, The Netherlands

## Section S1. Computational details for the periodic NMR chemical shifts calculations .

The VASP program was used to calculate  $^{13}\text{C}$  nuclear magnetic shielding tensors employing the gauge including projector augmented wave (GIPAW) algorithm<sup>1</sup>. Perdew, Burke, and Ernzerhof (PBE)<sup>2</sup> functionals with D3BJ dispersion correction<sup>3,4</sup> were adopted with the generalized gradient approximation (GGA) for the exchange correlation energy. A plane-wave basis set with a cutoff energy of 600 eV in combination with the projected augmented wave (PAW) method was used. Brillouin zone-sampling was restricted to the  $\Gamma$  point. Linear response method as implemented in VASP<sup>1,5</sup> was used to obtain chemical shift values.

1. C. J. Pickard and F. Mauri, *Physical Review B*, 2001, **63**, 245101.
2. J. P. Perdew, K. Burke and Y. Wang, *Physical Review B*, 1996, **54**, 16533-16539.
3. S. Grimme, J. Antony, S. Ehrlich and H. Krieg, *Journal of Chemical Physics*, 2010, **132**.
4. S. Grimme, S. Ehrlich and L. Goerigk, *Journal of Computational Chemistry*, 2011, **32**, 1456-1465.
5. J. R. Yates, C. J. Pickard and F. Mauri, *Physical Review B*, 2007, **76**, 024401.

**Table S1.**  $\sigma_{\text{ref}}$  values for the different calculation protocols.

|                       |              |           |
|-----------------------|--------------|-----------|
| PBE-D3/aug-cc-pVDZ    | Single point | 191.3 ppm |
|                       | Optimized    | 190.8 ppm |
| PBE0-D3/aug-cc-pVDZ   | Single point | 195.1 ppm |
|                       | Optimized    | 196.4 ppm |
| wB97xD/aug-cc-pVDZ    | Single point | 195.5 ppm |
|                       | Optimized    | 196.8 ppm |
| HSE06/aug-cc-pVDZ     | Single point | 194.6 ppm |
|                       | Optimized    | 195.8 ppm |
| mPW1PW91/aug-cc-pVDZ  | Single point | 194.6 ppm |
|                       | Optimized    | 195.8 ppm |
| B3PW91-D3/aug-cc-pVDZ | Single point | 193.7 ppm |
|                       | Optimized    | 195.0 ppm |

**Table S2.** Periodic PBE energy of the various Si–O(CH<sub>3</sub>)–Al methoxides.

| Methoxide | Energy, kJ/mol | Methoxide | Energy, kJ/mol |
|-----------|----------------|-----------|----------------|
| T1–T2     | 17             | T8–T9     | 17             |
| T1–T5     | 20             | T9–T6     | 0              |

|        |    |         |    |
|--------|----|---------|----|
| T7–T7  | 83 | T9–T9   | 24 |
| T7–T8  | 10 | T9–T10  | 3  |
| T7–T11 | 16 | T11–T12 | 5  |
| T8–T7  | 1  | T12–T12 | 27 |

**Table S3.** Calculated values of the  $^{13}\text{C}$  NMR chemical shifts of the methoxides placed in the different position throughout zeolite framework.

| Methoxide | PBE-D3/aug-cc-pVDZ (Single point)  |          | PBE-D3/aug-cc-pVDZ (Optimized)  |          |
|-----------|------------------------------------|----------|---------------------------------|----------|
|           | $\sigma$ , ppm                     | $\delta$ | $\sigma$ , ppm                  | $\delta$ |
| T1–T2     | 127.9                              | 63.4     | 129.1                           | 61.7     |
| T1–T5     | 129.4                              | 61.9     | 128.8                           | 62.0     |
| T7–T7     | 120.9                              | 70.4     | 123.0                           | 67.8     |
| T7–T8     | 129.3                              | 62.0     | 128.4                           | 62.4     |
| T7–T11    | 128.9                              | 62.4     | 129.7                           | 61.1     |
| T8–T7     | 129.4                              | 61.9     | 129.6                           | 61.2     |
| T8–T9     | 130.0                              | 61.3     | 128.7                           | 62.1     |
| T9–T6     | 130.0                              | 61.3     | 129.1                           | 61.7     |
| T9–T9     | 128.1                              | 63.2     | 129.8                           | 61.0     |
| T9–T10    | 129.3                              | 62.0     | 129.2                           | 61.6     |
| T11–T12   | 130.2                              | 61.1     | 130.2                           | 60.6     |
| T12–T12   | 128.8                              | 62.5     | 123.5                           | 67.3     |
| Methoxide | PBE0-D3/aug-cc-pVDZ (Single point) |          | PBE0-D3/aug-cc-pVDZ (Optimized) |          |
|           | $\sigma$ , ppm                     | $\delta$ | $\sigma$ , ppm                  | $\delta$ |
| T1–T2     | 132.4                              | 62.7     | 137.0                           | 59.3     |
| T1–T5     | 133.9                              | 61.2     | 136.6                           | 59.8     |
| T7–T7     | 125.8                              | 69.3     | 132.3                           | 64.0     |
| T7–T8     | 133.8                              | 61.3     | 136.7                           | 59.7     |
| T7–T11    | 133.3                              | 61.8     | 137.9                           | 58.5     |
| T8–T7     | 133.8                              | 61.3     | 137.7                           | 58.7     |
| T8–T9     | 134.3                              | 60.9     | 137.1                           | 59.3     |

|           |                                   |          |                                 |          |
|-----------|-----------------------------------|----------|---------------------------------|----------|
| T9-T6     | 134.4                             | 60.7     | 137.1                           | 59.3     |
| T9-T9     | 132.6                             | 62.5     | 137.5                           | 58.8     |
| T9-T10    | 133.9                             | 61.3     | 137.7                           | 58.7     |
| T11-T12   | 134.5                             | 60.6     | 137.8                           | 58.6     |
| T12-T12   | 133.3                             | 61.8     | 137.7                           | 58.6     |
| Methoxide | wB97xD/aug-cc-pVDZ (Single point) |          | wB97xD /aug-cc-pVDZ (Optimized) |          |
|           | $\sigma$ , ppm                    | $\delta$ | $\sigma$ , ppm                  | $\delta$ |
| T1-T2     | 132.8                             | 62.7     | 136.9                           | 59.9     |
| T1-T5     | 133.6                             | 61.9     | 136.2                           | 60.6     |
| T7-T7     | 126.1                             | 69.4     | 131.6                           | 65.2     |
| T7-T8     | 133.9                             | 61.6     | 136.2                           | 60.6     |
| T7-T11    | 133.2                             | 62.4     | 137.1                           | 59.7     |
| T8-T7     | 133.9                             | 61.6     | 137.1                           | 59.7     |
| T8-T9     | 133.9                             | 61.6     | 136.9                           | 59.9     |
| T9-T6     | 134.5                             | 61.0     | 136.9                           | 59.9     |
| T9-T9     | 132.5                             | 63.0     | 137.0                           | 59.8     |
| T9-T10    | 133.9                             | 61.6     | 137.2                           | 59.7     |
| T11-T12   | 134.7                             | 60.9     | 137.4                           | 59.5     |
| T12-T12   | 133.5                             | 62.0     | 134.4                           | 62.4     |
| Methoxide | HSE06/aug-cc-pVDZ (Single point)  |          | HSE06 /aug-cc-pVDZ (Optimized)  |          |
|           | $\sigma$ , ppm                    | $\delta$ | $\sigma$ , ppm                  | $\delta$ |
| T1-T2     | 131.7                             | 62.9     | 136.5                           | 59.3     |
| T1-T5     | 133.3                             | 61.3     | 135.7                           | 60.1     |
| T7-T7     | 125.0                             | 69.6     | 131.5                           | 64.3     |
| T7-T8     | 133.2                             | 61.4     | 135.9                           | 59.9     |
| T7-T11    | 132.7                             | 61.9     | 137.3                           | 58.5     |
| T8-T7     | 133.2                             | 61.4     | 136.9                           | 59.0     |
| T8-T9     | 133.6                             | 61.0     | 136.6                           | 59.2     |
| T9-T6     | 133.9                             | 60.7     | 136.1                           | 59.7     |
| T9-T9     | 132.0                             | 62.6     | 135.6                           | 60.2     |

|           |                                      |          |                                    |          |
|-----------|--------------------------------------|----------|------------------------------------|----------|
| T9-T10    | 133.2                                | 61.4     | 136.8                              | 59.0     |
| T11-T12   | 133.8                                | 60.8     | 137.0                              | 58.8     |
| T12-T12   | 132.6                                | 62.0     | 136.8                              | 59.1     |
| Methoxide | mPW1PW91/aug-cc-pVDZ (Single point)  |          | mPW1PW91 /aug-cc-pVDZ (Optimized)  |          |
|           | $\sigma$ , ppm                       | $\delta$ | $\sigma$ , ppm                     | $\delta$ |
| T1-T2     | 131.8                                | 62.8     | 136.8                              | 59.1     |
| T1-T5     | 133.3                                | 61.3     | 135.9                              | 59.9     |
| T7-T7     | 125.4                                | 69.3     | 132.2                              | 63.6     |
| T7-T8     | 133.3                                | 61.3     | 136.3                              | 59.5     |
| T7-T11    | 132.8                                | 61.8     | 137.8                              | 58.1     |
| T8-T7     | 133.2                                | 61.4     | 137.2                              | 58.7     |
| T8-T9     | 133.7                                | 61.0     | 137.0                              | 58.8     |
| T9-T6     | 133.8                                | 60.8     | 136.3                              | 59.5     |
| T9-T9     | 132.1                                | 62.6     | 135.4                              | 60.4     |
| T9-T10    | 133.3                                | 61.3     | 137.2                              | 58.6     |
| T11-T12   | 133.9                                | 60.7     | 137.4                              | 58.5     |
| T12-T12   | 132.8                                | 61.9     | 137.1                              | 58.7     |
| Methoxide | B3PW91-D3/aug-cc-pVDZ (Single point) |          | B3PW91-D3 /aug-cc-pVDZ (Optimized) |          |
|           | $\sigma$ , ppm                       | $\delta$ | $\sigma$ , ppm                     | $\delta$ |
| T1-T2     | 130.7                                | 63.0     | 134.8                              | 60.2     |
| T1-T5     | 132.1                                | 61.6     | 134.4                              | 60.6     |
| T7-T7     | 124.2                                | 69.5     | 129.8                              | 65.2     |
| T7-T8     | 132.2                                | 61.5     | 134.4                              | 60.6     |
| T7-T11    | 131.7                                | 62.0     | 135.6                              | 59.4     |
| T8-T7     | 132.1                                | 61.6     | 135.4                              | 59.6     |
| T8-T9     | 132.5                                | 61.2     | 134.4                              | 60.6     |
| T9-T6     | 132.6                                | 61.1     | 134.9                              | 60.0     |
| T9-T9     | 130.9                                | 62.8     | 135.8                              | 59.2     |
| T9-T10    | 132.2                                | 61.5     | 135.3                              | 59.6     |
| T11-T12   | 132.8                                | 60.9     | 135.4                              | 59.6     |

|         |       |      |       |      |
|---------|-------|------|-------|------|
| T12–T12 | 132.8 | 60.9 | 132.2 | 62.8 |
|---------|-------|------|-------|------|

**Table S4.** Mean calculated  $^{13}\text{C}$  chemical shifts and their value deviations.

| Single point calculations |                                             |           |                                             | Cluster geometry optimization |                                             |           |                                             |
|---------------------------|---------------------------------------------|-----------|---------------------------------------------|-------------------------------|---------------------------------------------|-----------|---------------------------------------------|
| Methoxide                 | Mean $^{13}\text{C}$<br>chem. shift,<br>ppm | Methoxide | Mean $^{13}\text{C}$<br>chem. shift,<br>ppm | Methoxide                     | Mean $^{13}\text{C}$<br>chem. shift,<br>ppm | Methoxide | Mean $^{13}\text{C}$<br>chem. shift,<br>ppm |
| T1–T2                     | 62.9 ± 0.3                                  | T8–T9     | 61.0 ± 0.2                                  | T1–T2                         | 59.9 ± 1.0                                  | T8–T9     | 59.9 ± 1.2                                  |
| T1–T5                     | 61.5 ± 0.3                                  | T9–T6     | 60.9 ± 0.2                                  | T1–T5                         | 60.5 ± 0.8                                  | T9–T6     | 60.0 ± 0.9                                  |
| T7–T7                     | 69.6 ± 0.4                                  | T9–T9     | 62.8 ± 0.3                                  | T7–T7                         | 65.0 ± 1.5                                  | T9–T9     | 59.9 ± 0.8                                  |
| T7–T8                     | 61.5 ± 0.3                                  | T9–T10    | 61.5 ± 0.3                                  | T7–T8                         | 60.4 ± 1.0                                  | T9–T10    | 59.5 ± 1.1                                  |
| T7–T11                    | 62.1 ± 0.3                                  | T11–T12   | 60.8 ± 0.2                                  | T7–T11                        | 59.2 ± 1.0                                  | T11–T12   | 59.3 ± 0.8                                  |
| T8–T7                     | 61.5 ± 0.2                                  | T12–T12   | 61.8 ± 0.5                                  | T8–T7                         | 59.5 ± 1.1                                  | T12–T12   | 61.2 ± 3.4                                  |

**Table S5.** Calculated values of the  $^{13}\text{C}$  NMR chemical shifts of the various possible methane activation products adsorbed on the MFI zeolite framework.

| Methoxide                                        | PBE-D3/aug-cc-pVDZ (Single point) |                | PBE-D3/aug-cc-pVDZ (Optimized) |                |
|--------------------------------------------------|-----------------------------------|----------------|--------------------------------|----------------|
|                                                  | $\sigma$ , ppm                    | $\delta$ , ppm | $\sigma$ , ppm                 | $\delta$ , ppm |
| Si(OCH <sub>3</sub> )Al                          | 127.9                             | 63.4           | 129.1                          | 61.7           |
| CH <sub>3</sub> OH..BAS                          | 138.3                             | 52.5           | 143.9                          | 48.6           |
| (CH <sub>3</sub> ) <sub>2</sub> O – atom 1       | 121.0                             | 69.8           | 129.2                          | 63.3           |
| (CH <sub>3</sub> ) <sub>2</sub> O – atom 2       | 124.7                             | 66.1           | 129.2                          | 63.3           |
| (CH <sub>3</sub> ) <sub>2</sub> O – mean         | 122.8                             | 68.0           | 129.2                          | 63.3           |
| Cu..CH <sub>3</sub> OH                           | 125.5                             | 65.3           | 129.1                          | 63.4           |
| Cu.. (CH <sub>3</sub> ) <sub>2</sub> O – atom 1  | 117.7                             | 73.1           | 119.2                          | 73.3           |
| Cu.. (CH <sub>3</sub> ) <sub>2</sub> O – atom 2  | 116.6                             | 74.2           | 120.9                          | 71.6           |
| Cu.. (CH <sub>3</sub> ) <sub>2</sub> O – mean    | 117.2                             | 73.6           | 120.0                          | 72.5           |
| [Cu( $\mu$ -OCH <sub>3</sub> )Cu] <sup>2+</sup>  | 121.5                             | 69.3           | 122.6                          | 69.9           |
| [Cu( $\mu$ -CH <sub>3</sub> OH)Cu] <sup>2+</sup> | 109.8                             | 81.0           | 114.1                          | 78.4           |

|                                                       |                                    |        |                                 |        |
|-------------------------------------------------------|------------------------------------|--------|---------------------------------|--------|
| Si(OCH <sub>3</sub> )Al ... [Cu(μ-OH)Cu] <sup>+</sup> | 127.6                              | 63.2   | 126.9                           | 65.6   |
| Methoxide                                             | PBE0-D3/aug-cc-pVDZ (Single point) |        | PBE0-D3/aug-cc-pVDZ (Optimized) |        |
|                                                       | σ, ppm                             | δ, ppm | σ, ppm                          | δ, ppm |
| Si(OCH <sub>3</sub> )Al                               | 132.4                              | 62.7   | 137.0                           | 59.3   |
| CH <sub>3</sub> OH..BAS                               | 143.0                              | 52.1   | 146.8                           | 49.6   |
| (CH <sub>3</sub> ) <sub>2</sub> O – atom 1            | 126.7                              | 68.4   | 137.5                           | 58.8   |
| (CH <sub>3</sub> ) <sub>2</sub> O – atom 2            | 130.3                              | 64.8   | 134.9                           | 61.4   |
| (CH <sub>3</sub> ) <sub>2</sub> O – mean              | 128.5                              | 66.6   | 136.2                           | 60.1   |
| Cu..CH <sub>3</sub> OH                                | 131.6                              | 63.5   | 138.2                           | 58.2   |
| Cu.. (CH <sub>3</sub> ) <sub>2</sub> O – atom 1       | 124.2                              | 70.9   | 129.3                           | 67.1   |
| Cu.. (CH <sub>3</sub> ) <sub>2</sub> O – atom 2       | 123.2                              | 71.9   | 129.6                           | 66.7   |
| Cu.. (CH <sub>3</sub> ) <sub>2</sub> O – mean         | 123.7                              | 71.4   | 129.5                           | 66.9   |
| [Cu(μ-OCH <sub>3</sub> )Cu] <sup>2+</sup>             | 128.6                              | 66.5   | 132.2                           | 64.1   |
| [Cu(μ-CH <sub>3</sub> OH)Cu] <sup>2+</sup>            | 118.1                              | 77.0   | 126.3                           | 70.1   |
| Si(OCH <sub>3</sub> )Al ... [Cu(μ-OH)Cu] <sup>+</sup> | 131.8                              | 63.3   | 137.3                           | 59.0   |
| Methoxide                                             | wB97xD/aug-cc-pVDZ (Single point)  |        | wB97xD /aug-cc-pVDZ (Optimized) |        |
|                                                       | σ, ppm                             | δ, ppm | σ, ppm                          | δ, ppm |
| Si(OCH <sub>3</sub> )Al                               | 132.8                              | 62.7   | 136.9                           | 59.9   |
| CH <sub>3</sub> OH..BAS                               | 143.1                              | 52.4   | 146.6                           | 50.3   |
| (CH <sub>3</sub> ) <sub>2</sub> O – atom 1            | 127.2                              | 68.3   | 138.0                           | 58.8   |
| (CH <sub>3</sub> ) <sub>2</sub> O – atom 2            | 130.7                              | 64.8   | 135.7                           | 61.1   |
| (CH <sub>3</sub> ) <sub>2</sub> O – mean              | 129.0                              | 66.5   | 136.9                           | 60.0   |
| Cu..CH <sub>3</sub> OH                                | 131.7                              | 63.8   | 138.2                           | 58.7   |
| Cu.. (CH <sub>3</sub> ) <sub>2</sub> O – atom 1       | 125.0                              | 70.6   | 128.9                           | 67.9   |
| Cu.. (CH <sub>3</sub> ) <sub>2</sub> O – atom 2       | 123.6                              | 71.9   | 129.7                           | 67.2   |
| Cu.. (CH <sub>3</sub> ) <sub>2</sub> O – mean         | 124.3                              | 71.2   | 129.3                           | 67.5   |
| [Cu(μ-OCH <sub>3</sub> )Cu] <sup>2+</sup>             | 129.3                              | 66.2   | 132.3                           | 64.5   |

|                                                            |                                     |                |                                   |                |
|------------------------------------------------------------|-------------------------------------|----------------|-----------------------------------|----------------|
| [Cu( $\mu$ -CH <sub>3</sub> OH)Cu] <sup>2+</sup>           | 118.2                               | 77.3           | 126.5                             | 70.3           |
| Si(OCH <sub>3</sub> )Al .. [Cu( $\mu$ -OH)Cu] <sup>+</sup> | 130.7                               | 64.8           | 137.7                             | 59.1           |
| Methoxide                                                  | HSE06/aug-cc-pVDZ (Single point)    |                | HSE06 /aug-cc-pVDZ (Optimized)    |                |
|                                                            | $\sigma$ , ppm                      | $\delta$ , ppm | $\sigma$ , ppm                    | $\delta$ , ppm |
| Si(OCH <sub>3</sub> )Al                                    | 131.7                               | 62.9           | 136.5                             | 59.3           |
| CH <sub>3</sub> OH..BAS                                    | 142.5                               | 52.2           | 146.8                             | 49.1           |
| (CH <sub>3</sub> ) <sub>2</sub> O – atom 1                 | 126.0                               | 68.6           | 136.8                             | 59.0           |
| (CH <sub>3</sub> ) <sub>2</sub> O – atom 2                 | 129.7                               | 64.9           | 136.6                             | 59.2           |
| (CH <sub>3</sub> ) <sub>2</sub> O – mean                   | 127.9                               | 66.7           | 136.7                             | 59.1           |
| Cu..CH <sub>3</sub> OH                                     | 131.0                               | 63.6           | 137.1                             | 58.8           |
| Cu.. (CH <sub>3</sub> ) <sub>2</sub> O – atom 1            | 123.7                               | 70.9           | 128.7                             | 67.2           |
| Cu.. (CH <sub>3</sub> ) <sub>2</sub> O – atom 2            | 122.5                               | 72.1           | 129.6                             | 66.3           |
| Cu.. (CH <sub>3</sub> ) <sub>2</sub> O – mean              | 123.1                               | 71.5           | 129.1                             | 66.7           |
| [Cu( $\mu$ -OCH <sub>3</sub> )Cu] <sup>2+</sup>            | 127.9                               | 66.7           | 131.5                             | 64.3           |
| [Cu( $\mu$ -CH <sub>3</sub> OH)Cu] <sup>2+</sup>           | 117.5                               | 77.1           | 125.0                             | 70.8           |
| Si(OCH <sub>3</sub> )Al .. [Cu( $\mu$ -OH)Cu] <sup>+</sup> | 130.9                               | 63.7           | 136.3                             | 59.6           |
| Methoxide                                                  | mPW1PW91/aug-cc-pVDZ (Single point) |                | mPW1PW91 /aug-cc-pVDZ (Optimized) |                |
|                                                            | $\sigma$ , ppm                      | $\delta$ , ppm | $\sigma$ , ppm                    | $\delta$ , ppm |
| Si(OCH <sub>3</sub> )Al                                    |                                     |                |                                   |                |
| CH <sub>3</sub> OH..BAS                                    | 131.8                               | 62.8           | 136.8                             | 59.1           |
| (CH <sub>3</sub> ) <sub>2</sub> O – atom 2                 | 142.5                               | 52.2           | 147.0                             | 48.8           |
| (CH <sub>3</sub> ) <sub>2</sub> O – atom 1                 | 126.5                               | 68.1           | 137.6                             | 58.3           |
| (CH <sub>3</sub> ) <sub>2</sub> O – atom 2                 | 130.0                               | 64.6           | 137.1                             | 58.7           |
| (CH <sub>3</sub> ) <sub>2</sub> O – mean                   | 128.3                               | 66.4           | 137.4                             | 58.5           |
| Cu..CH <sub>3</sub> OH                                     | 131.2                               | 63.4           | 137.4                             | 58.5           |
| Cu.. (CH <sub>3</sub> ) <sub>2</sub> O – atom 1            | 123.8                               | 70.8           | 130.0                             | 65.8           |
| Cu.. (CH <sub>3</sub> ) <sub>2</sub> O – atom              | 123.0                               | 71.7           | 130.5                             | 65.3           |



|                                                      |                                      |        |                                    |        |
|------------------------------------------------------|--------------------------------------|--------|------------------------------------|--------|
| 2                                                    |                                      |        |                                    |        |
| Cu.. (CH <sub>3</sub> ) <sub>2</sub> O – mean        | 123.4                                | 71.2   | 130.3                              | 65.5   |
| [Cu(μ-OCH <sub>3</sub> )Cu] <sup>2+</sup>            | 128.5                                | 66.1   | 132.6                              | 63.3   |
| [Cu(μ-CH <sub>3</sub> OH)Cu] <sup>2+</sup>           | 117.9                                | 76.7   | 125.8                              | 70.0   |
| Si(OCH <sub>3</sub> )Al .. [Cu(μ-OH)Cu] <sup>+</sup> | 131.1                                | 63.5   | 136.8                              | 59.0   |
| Methoxide                                            | B3PW91-D3/aug-cc-pVDZ (Single point) |        | B3PW91-D3 /aug-cc-pVDZ (Optimized) |        |
|                                                      | σ, ppm                               | δ, ppm | σ, ppm                             | δ, ppm |
| Si(OCH <sub>3</sub> )Al                              | 130.7                                | 63.0   | 134.8                              | 60.2   |
| CH <sub>3</sub> OH..BAS                              | 141.4                                | 52.4   | 144.9                              | 50.1   |
| (CH <sub>3</sub> ) <sub>2</sub> O – atom 1           | 125.3                                | 68.4   | 136.2                              | 58.7   |
| (CH <sub>3</sub> ) <sub>2</sub> O – atom 2           | 128.8                                | 64.9   | 134.1                              | 60.9   |
| (CH <sub>3</sub> ) <sub>2</sub> O – mean             | 127.0                                | 66.7   | 135.2                              | 59.8   |
| Cu..CH <sub>3</sub> OH                               | 129.9                                | 63.8   | 136.2                              | 58.8   |
| Cu.. (CH <sub>3</sub> ) <sub>2</sub> O – atom 1      | 122.5                                | 71.3   | 126.4                              | 68.5   |
| Cu.. (CH <sub>3</sub> ) <sub>2</sub> O – atom 2      | 121.5                                | 72.2   | 128.2                              | 66.8   |
| Cu.. (CH <sub>3</sub> ) <sub>2</sub> O – mean        | 122.0                                | 71.7   | 127.3                              | 67.7   |
| [Cu(μ-OCH <sub>3</sub> )Cu] <sup>2+</sup>            | 127.1                                | 66.6   | 130.2                              | 64.7   |
| [Cu(μ-CH <sub>3</sub> OH)Cu] <sup>2+</sup>           | 116.3                                | 77.4   | 124.2                              | 70.8   |
| Si(OCH <sub>3</sub> )Al .. [Cu(μ-OH)Cu] <sup>+</sup> | 130.0                                | 63.7   | 135.0                              | 60.0   |

**Table S6.** Mean calculated <sup>13</sup>C chemical shifts of the possible methane and their value deviations.

| Single point calculations |                                       |                                                 |                                       | Cluster geometry optimization |                                       |                                                 |                                       |
|---------------------------|---------------------------------------|-------------------------------------------------|---------------------------------------|-------------------------------|---------------------------------------|-------------------------------------------------|---------------------------------------|
| Methoxide                 | Mean <sup>13</sup> C chem. shift, ppm | Methoxide                                       | Mean <sup>13</sup> C chem. shift, ppm | Methoxide                     | Mean <sup>13</sup> C chem. shift, ppm | Methoxide                                       | Mean <sup>13</sup> C chem. shift, ppm |
| Si(OCH <sub>3</sub> )Al   | 62.9 ± 0.3                            | Cu.. (CH <sub>3</sub> ) <sub>2</sub> O – atom 1 | 71.3 ± 0.9                            | Si(OCH <sub>3</sub> )Al       | 59.9 ± 1.0                            | Cu.. (CH <sub>3</sub> ) <sub>2</sub> O – atom 1 | 68.3 ± 2.6                            |
| CH <sub>3</sub> OH..BAS   | 52.3 ± 0.2                            | Cu.. (CH <sub>3</sub> ) <sub>2</sub> O –        | 72.4 ± 0.9                            | CH <sub>3</sub> OH..BAS       | 50.1 ± 1.5                            | Cu.. (CH <sub>3</sub> ) <sub>2</sub> O –        | 67.3 ± 2.2                            |

|                                               |            |                                                         |            |                                               |            |                                                         |            |
|-----------------------------------------------|------------|---------------------------------------------------------|------------|-----------------------------------------------|------------|---------------------------------------------------------|------------|
|                                               |            | atom 2                                                  |            |                                               |            | atom 2                                                  |            |
| (CH <sub>3</sub> ) <sub>2</sub> O –<br>atom 1 | 68.6 ± 0.6 | Cu..(CH <sub>3</sub> ) <sub>2</sub> O –<br>mean         | 70.2 ± 2.4 | (CH <sub>3</sub> ) <sub>2</sub> O –<br>atom 1 | 59.5 ± 1.9 | Cu..(CH <sub>3</sub> ) <sub>2</sub> O –<br>mean         | 67.8 ± 2.4 |
| (CH <sub>3</sub> ) <sub>2</sub> O –<br>atom 2 | 65.0 ± 0.5 | [Cu(μ-<br>OCH <sub>3</sub> )Cu] <sup>2+</sup>           | 67.0 ± 1.3 | (CH <sub>3</sub> ) <sub>2</sub> O –<br>atom 2 | 60.7 ± 1.7 | [Cu(μ-<br>OCH <sub>3</sub> )Cu] <sup>2+</sup>           | 65.5 ± 2.3 |
| (CH <sub>3</sub> ) <sub>2</sub> O –<br>mean   | 66.8 ± 0.6 | [Cu(μ-<br>CH <sub>3</sub> OH)Cu] <sup>2+</sup>          | 77.7 ± 1.6 | (CH <sub>3</sub> ) <sub>2</sub> O –<br>mean   | 60.1 ± 1.6 | [Cu(μ-<br>CH <sub>3</sub> OH)Cu] <sup>2+</sup>          | 71.7 ± 3.3 |
| Cu..CH <sub>3</sub> OH                        | 63.9 ± 0.7 | Si(OCH <sub>3</sub> )Al ..<br>[Cu(μ-OH)Cu] <sup>+</sup> | 63.7 ± 0.6 | Cu..CH <sub>3</sub> OH                        | 59.4 ± 1.9 | Si(OCH <sub>3</sub> )Al ..<br>[Cu(μ-OH)Cu] <sup>+</sup> | 60.6 ± 2.8 |

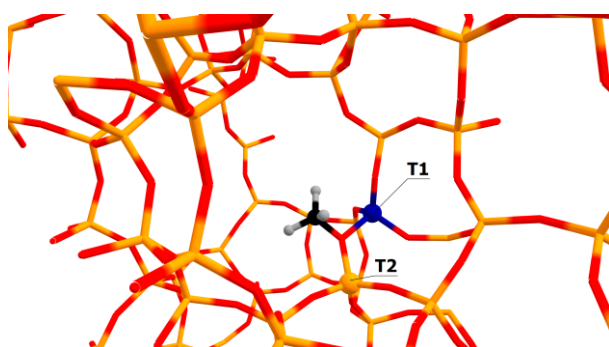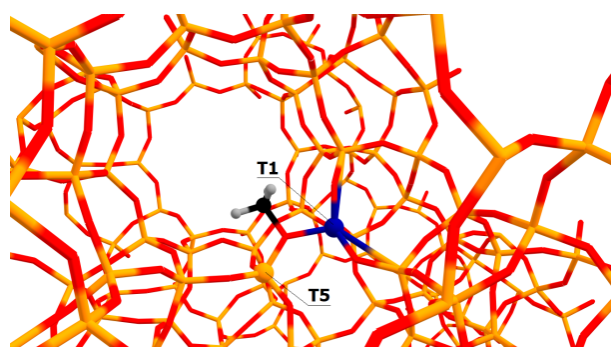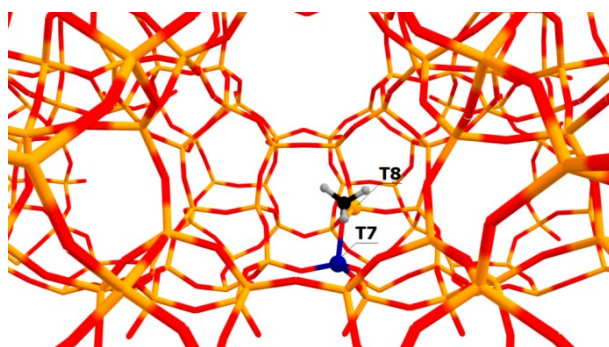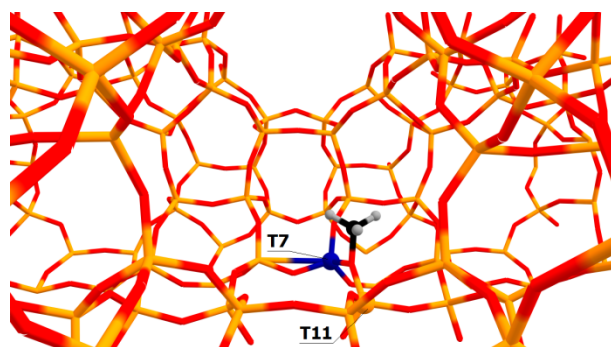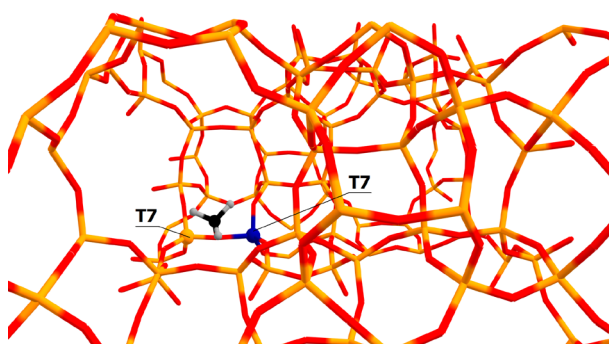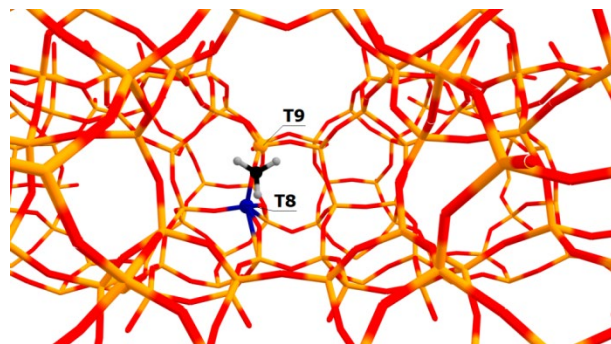

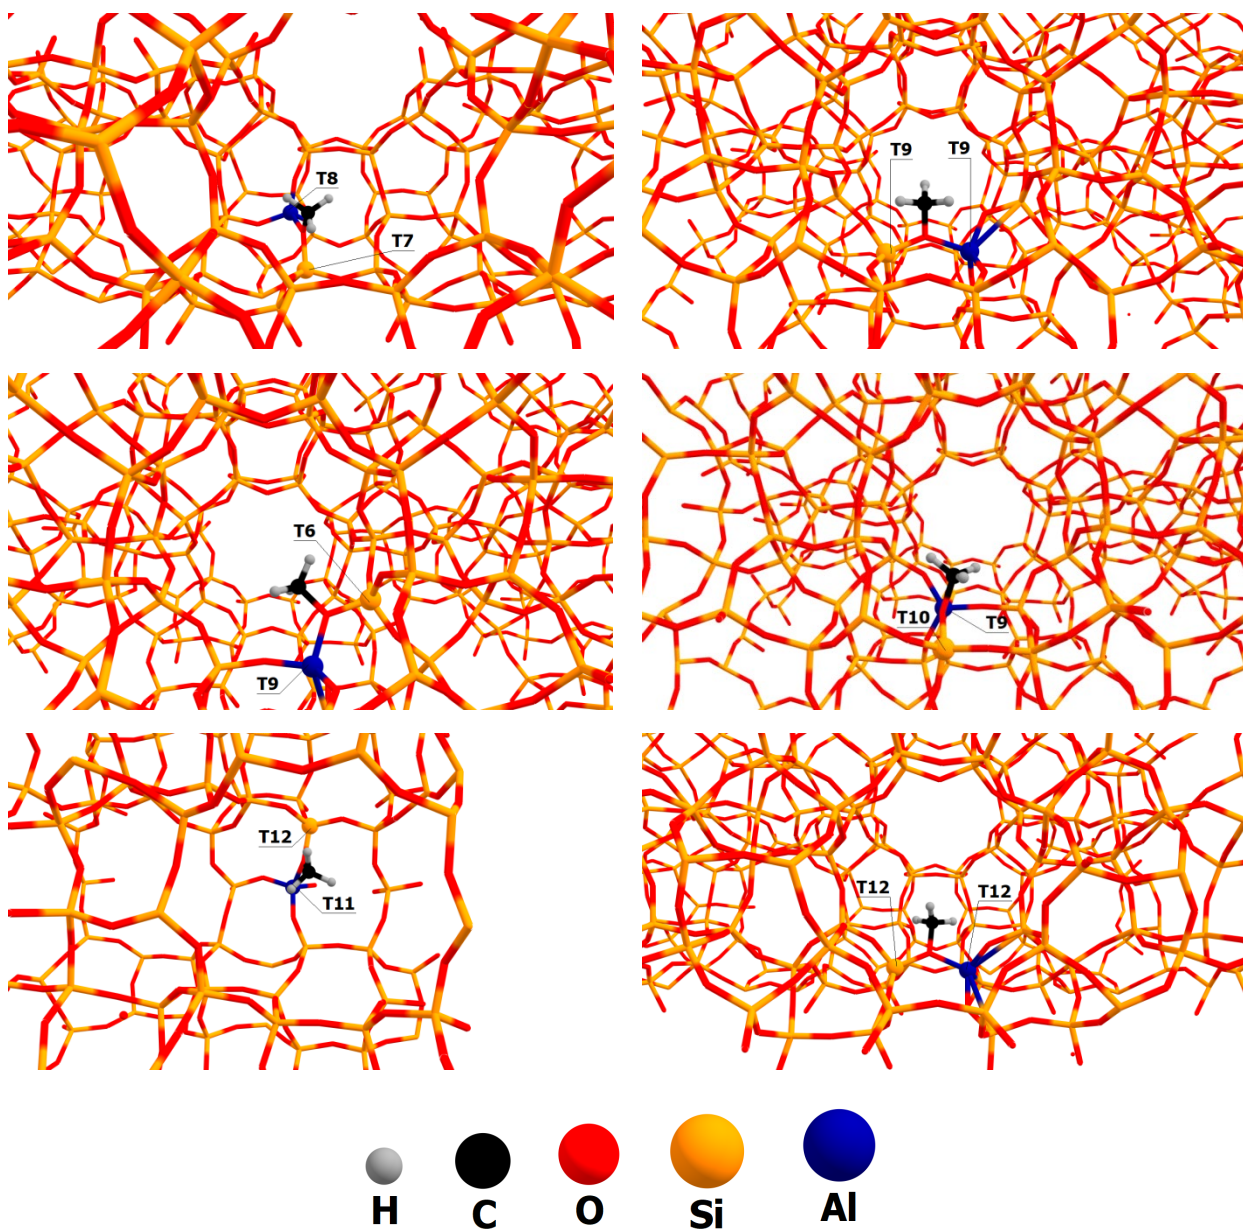

Figure S1. Optimized structures of the methoxides used for the calculations.

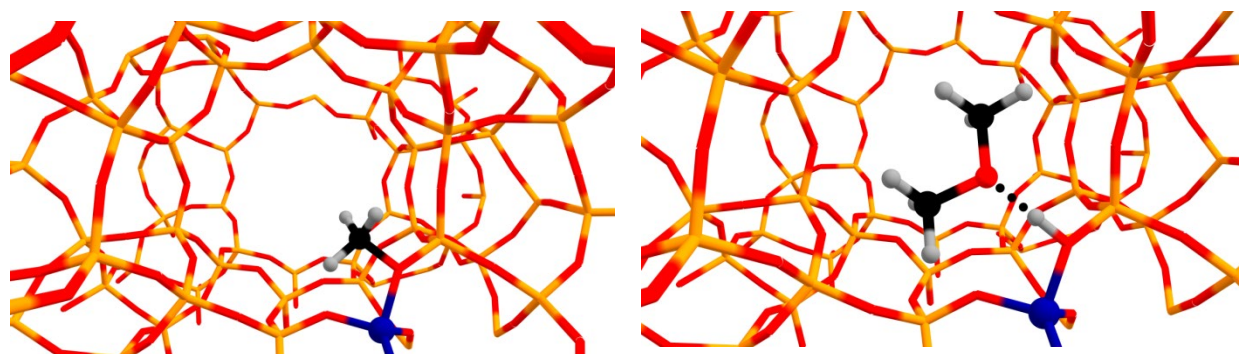

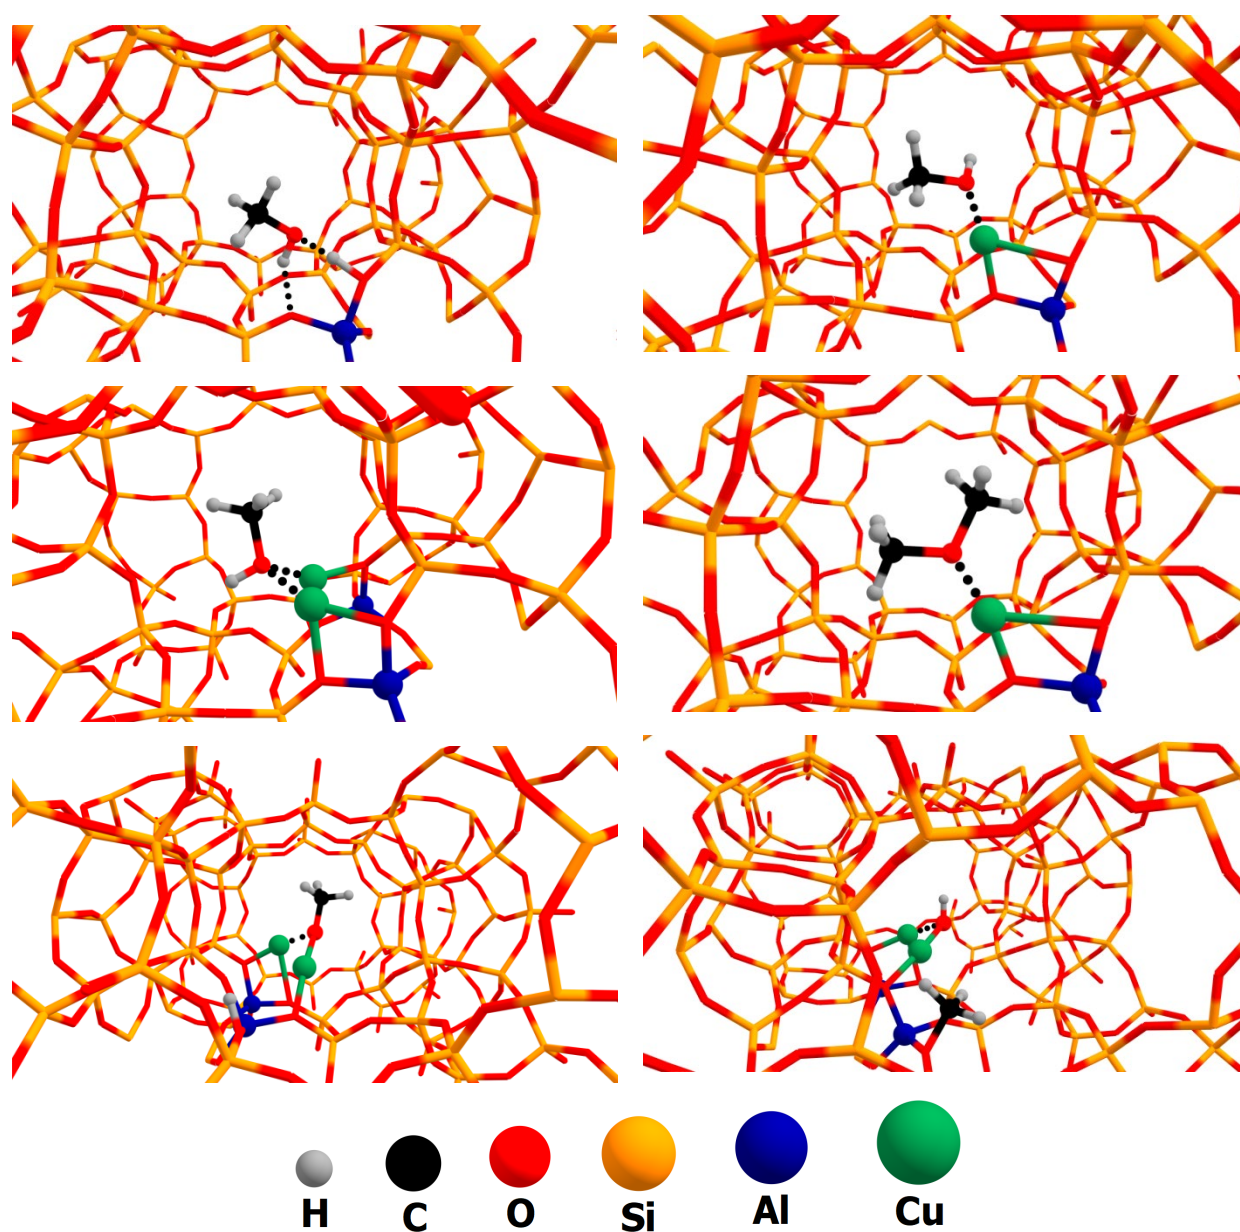

**Figure S2.** Optimized structure of the methane activation adsorbed products used for the  $^{13}\text{C}$  NMR chemical shifts calculations. On left:  $\text{SiO}(\text{CH}_3)\text{Al}$  methoxide, methanol adsorbed on Bronsted acid site, methanol adsorbed between two copper atoms  $[\text{Cu}(\mu\text{-CH}_3\text{OH})\text{Cu}]^{2+}$ , methoxide  $[\text{Cu}(\mu\text{-OCH}_3)\text{Cu}]^{2+}$ . On the right: dimethyl ether adsorbed on BAS, methanol adsorbed on  $\text{Cu}^+$  cation, dimethyl ether adsorbed on  $\text{Cu}^+$  cation, and  $\text{Si}(\text{OCH}_3)\text{Al}$  methoxide adsorbed near the  $[\text{Cu}(\mu\text{-OH})\text{Cu}]^+$  site.

**Figure S3.** Optimized structures of the intermediates containing  $[\text{Cu}(\mu\text{-O})\text{Cu}]^{2+}$  core and their energies.

| Structure | Optimized geometry | Relative energy,(kJ/mol) |
|-----------|--------------------|--------------------------|
|-----------|--------------------|--------------------------|

|                                                                             |                                                                                      |             |
|-----------------------------------------------------------------------------|--------------------------------------------------------------------------------------|-------------|
| <p>Methane adsorbed on<br/>[Cu(<math>\mu</math>-O)Cu]<sup>2+</sup> site</p> | 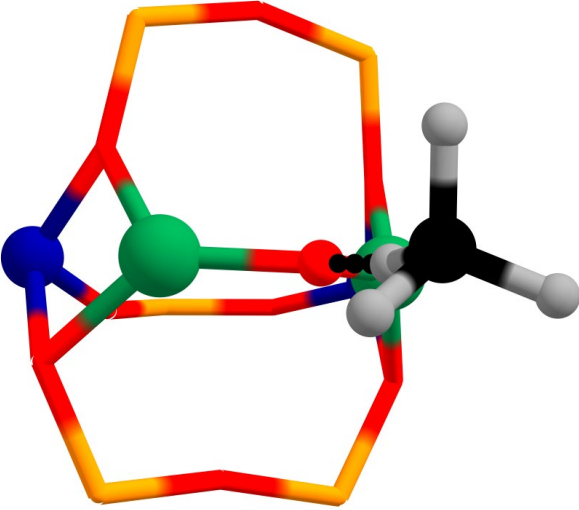   | <p>0</p>    |
| <p>[Cu(<math>\mu</math>-CH<sub>3</sub>OH)Cu]<sup>2+</sup></p>               |   | <p>-148</p> |
| <p>[Cu(<math>\mu</math>-OCH<sub>3</sub>)Cu]<sup>2+</sup></p>                |  | <p>-105</p> |

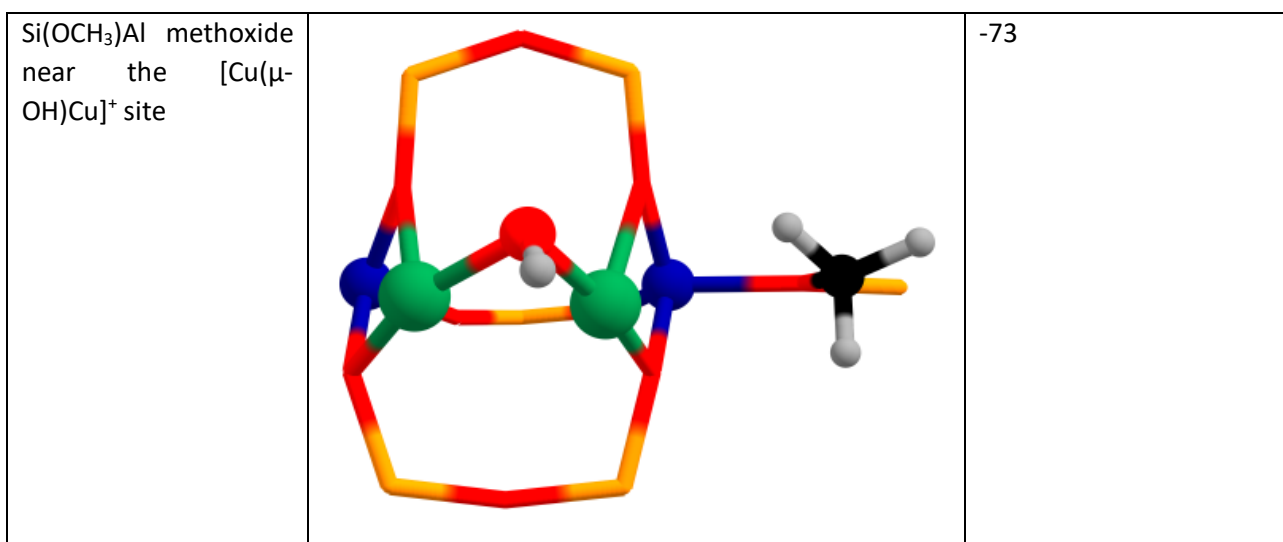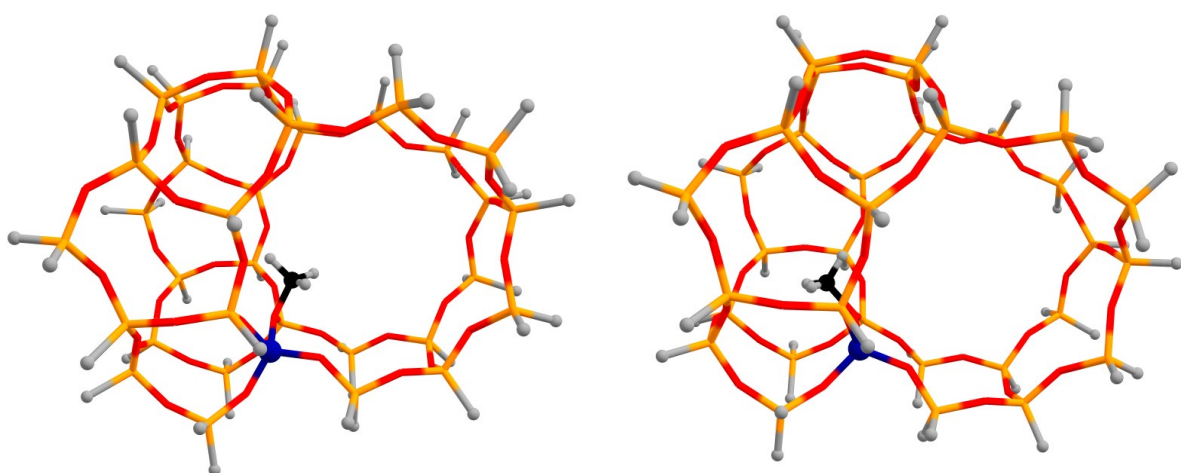

**Figure S4.** Cluster structure constructed from the optimized structure of T12–T12 methoxide (left) and optimized geometry of this cluster (right).

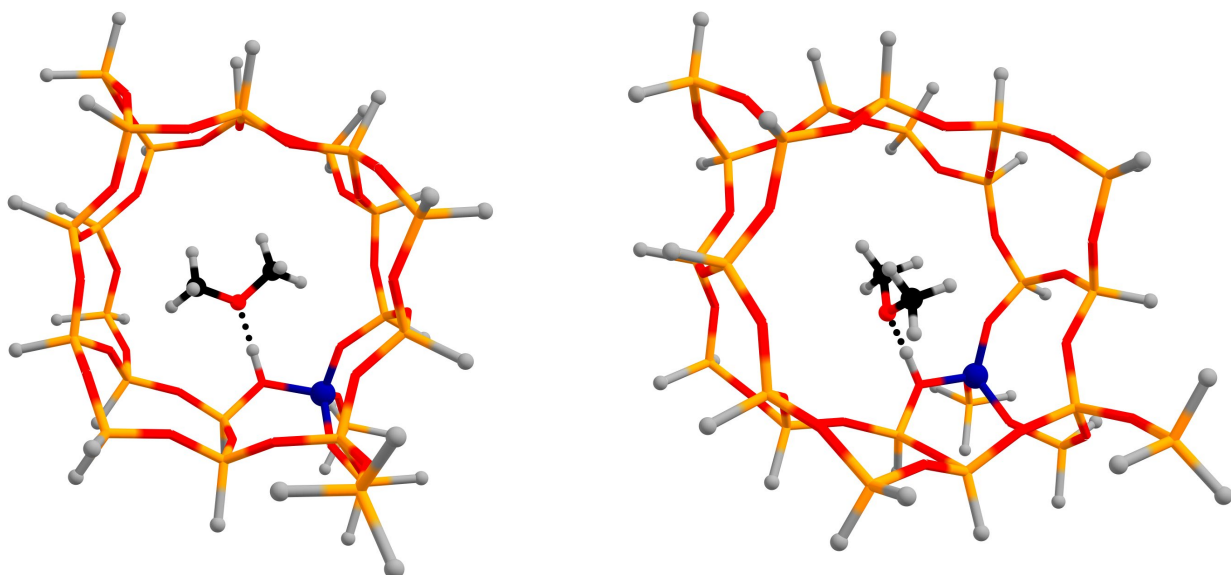

Figure S5. Cluster structure constructed from the optimized structure of dimethyl ether adsorbed on BAS (left) and optimized geometry of this cluster (right).

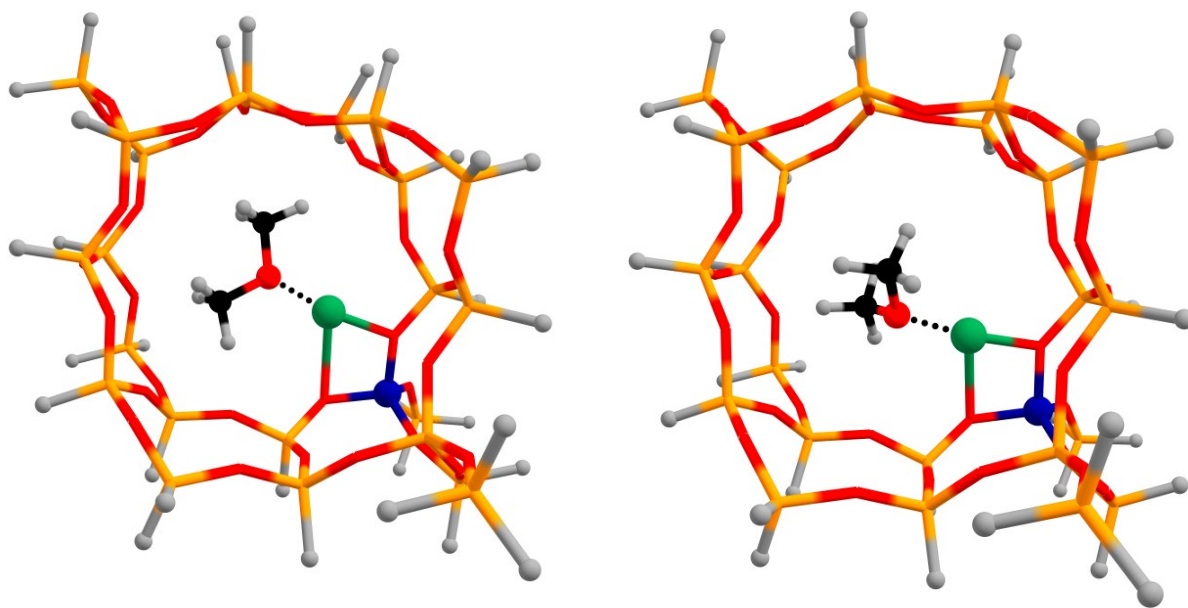

Figure S6. Cluster structure constructed from the optimized structure of dimethyl ether adsorbed on Cu<sup>+</sup> cation (left) and optimized geometry of this cluster (right).
